# Supplementary material
Source: publisher figshare collection journal article supplement (https://acs.figshare.com/ndownloader/files/3977605)
Supplement: Supplementary file 1 [file 3977605]

## SUPPORTING INFORMATION

### Heat of Decomposition Estimates

|                                            |                                      |                   |                         |   |                             |
|--------------------------------------------|--------------------------------------|-------------------|-------------------------|---|-----------------------------|
|                                            | $3 \text{ N}_2\text{H}_4 (\text{l})$ | $\longrightarrow$ | $\text{N}_2 (\text{g})$ | + | $4 \text{ NH}_3 (\text{g})$ |
| $\Delta H_f, (\text{kJ/mole}) =$           | 50.63                                |                   | 0.00                    |   | -46.11                      |
|                                            |                                      |                   |                         |   |                             |
| $\Delta H_{\text{rxn}} (\text{kJ/mole}) =$ | -112.11                              |                   |                         |   |                             |

**Figure 1. Heat of decomposition estimate using heats of formation for liquid hydrazine decomposing to nitrogen and ammonia (heats of formation from NBS Tables<sup>1</sup>).**

|                                            |                                      |                   |                         |   |                             |
|--------------------------------------------|--------------------------------------|-------------------|-------------------------|---|-----------------------------|
|                                            | $3 \text{ N}_2\text{H}_4 (\text{g})$ | $\longrightarrow$ | $\text{N}_2 (\text{g})$ | + | $4 \text{ NH}_3 (\text{g})$ |
| $\Delta H_f, (\text{kJ/mole}) =$           | 95.40                                |                   | 0.00                    |   | -46.11                      |
|                                            |                                      |                   |                         |   |                             |
| $\Delta H_{\text{rxn}} (\text{kJ/mole}) =$ | -156.88                              |                   |                         |   |                             |

**Figure 2. Heat of decomposition estimate using heats of formation for gaseous hydrazine decomposing to nitrogen and ammonia (heats of formation from NBS Tables<sup>1</sup>).**

Some of the important properties of hydrazine and hydrazine hydrate are summarized in the tables below.

**Table 1. Hydrazine properties<sup>2</sup>**

| Identity                                      |                                                     |
|-----------------------------------------------|-----------------------------------------------------|
| CAS                                           | 302-01-2                                            |
| Formula                                       | H <sub>2</sub> NNH <sub>2</sub>                     |
| Physical Properties                           |                                                     |
| Appearance                                    | colorless, fuming, hygroscopic liquid. <sup>3</sup> |
| Melting point                                 | 2.0 °C <sup>4</sup>                                 |
| Boiling point                                 | 113.5 °C <sup>4</sup>                               |
| Heat of formation, 298 °K, liquid             | +50.434 kJ/mole                                     |
| Heat of fusion                                | 12.657 kJ/mole                                      |
| Heat of vaporization, at normal boiling point | 39.079 kJ/mole                                      |
| Density                                       | 1.004 g/ml at 25 °C <sup>4</sup>                    |
| Vapor pressure                                | 0.014 atm at 20 °C <sup>5</sup>                     |
| pH (1% solution)                              | 10.1-10.7 <sup>4</sup>                              |
| Miscible solvents                             | Water and alcohol                                   |
| Immiscible solvents                           | Chloroform, Ether                                   |
| Flammability Properties                       |                                                     |
| Closed cup flash point                        | 38 °C <sup>4,6,7</sup>                              |
| Flammability range (LFL measured at 100 °C)   | 4.7-100% at 100 °C <sup>4,8,9, 10</sup>             |
| Autoignition temperature                      | 178 °C <sup>11</sup>                                |

|                                                                     |                                                                                                                                                    |
|---------------------------------------------------------------------|----------------------------------------------------------------------------------------------------------------------------------------------------|
| Lower pressure limit at room temperature <sup>12</sup>              | 0.014 atm <sup>13</sup>                                                                                                                            |
| Heat of combustion (upper) for Hydrazine liquid <sup>14</sup>       | -622 kJ/mole <sup>6</sup>                                                                                                                          |
| Vapor detonable?                                                    | Yes                                                                                                                                                |
| Liquid detonable?                                                   | No                                                                                                                                                 |
| Other                                                               | May self-heat to ignition if spilled onto porous or fibrous materials                                                                              |
| Thermal Stability                                                   |                                                                                                                                                    |
| Heat of decomposition for liquid                                    | -112 kJ/mole (3500 J/g) assuming decomposition to N <sub>2</sub> and NH <sub>3</sub> . <sup>15</sup>                                               |
| Exotherm detection temperature                                      | Generally > 200 °C, but can be much lower if exposed to certain metals, metal oxides, or organic materials.                                        |
| Toxicity                                                            |                                                                                                                                                    |
| Toxicity                                                            | Toxic by ingestion, inhalation, and skin absorption; strong irritant to skin and eyes; a carcinogen (US OSHA)3; readily absorbed through the skin. |
| Carcinogenicity Level                                               | IARC 2B (confirmed animal carcinogen – possibly human carcinogen) <sup>16</sup>                                                                    |
| NIOSH Immediately Dangerous to Life and Health (IDLH) concentration | 50 ppm <sup>17</sup>                                                                                                                               |
| US OSHA Permissible Exposure Limit (PEL)                            | 1 ppm TWA                                                                                                                                          |
| ACGIH Threshold Limit Value (TLV)                                   | 0.01 ppm TWA <sup>18</sup>                                                                                                                         |
| NIOSH Recommended Exposure Limit (REL)                              | 0.03 ppm <sup>19</sup>                                                                                                                             |
| Lethal Dose - 50% probability (LD50) Oral -                         | 60 mg/kg <sup>10</sup>                                                                                                                             |

|                                                                            |                                               |
|----------------------------------------------------------------------------|-----------------------------------------------|
| rat                                                                        |                                               |
| Lethal Dose - 50% probability (LD50)<br>Dermal - rabbit                    | 91 mg/kg <sup>10</sup>                        |
| Lethal Concentration - 50% probability (LC50)<br>Inhalation - mouse - 4 hr | 252 ppm <sup>10</sup>                         |
| Toxicity to fish; LC50 - <i>Poecilia reticulata</i> (guppy)                | 0.28 mg/l - 96.0 h (very toxic) <sup>10</sup> |
| Odor threshold                                                             | 3-5 ppm <sup>20</sup>                         |

| Transportation                                |                                                                                                            |
|-----------------------------------------------|------------------------------------------------------------------------------------------------------------|
| UN Number                                     | 2029                                                                                                       |
| UN and US CFR <sup>21</sup><br>Classification | 8 (Corrosives); subsidiary classifications 3 (Flammable Liquid) and 6.1 (Toxic Substance); packing group I |

**Table 2. Hydrazine hydrate properties (see Table 1 for toxicity and miscibility information)<sup>22</sup>**

| Identity                   |                                                   |
|----------------------------|---------------------------------------------------|
| CAS                        | 7803-57-8                                         |
| Formula                    | H <sub>2</sub> NNH <sub>2</sub> •H <sub>2</sub> O |
| Physical Properties        |                                                   |
| Appearance                 | colorless, fuming liquid                          |
| Wt% hydrazine              | 64                                                |
| Melting point              | -51.7 °C                                          |
| Boiling point              | 119.4 °C                                          |
| Vapor pressure             | 0.0097 atm at 20 °C <sup>23</sup>                 |
| Partial pressure hydrazine | 0.0039 atm (3900 ppm) at 20 °C <sup>23</sup>      |
| Density                    | 1.032 g/ml                                        |

|                                            |                                                                                                            |
|--------------------------------------------|------------------------------------------------------------------------------------------------------------|
| Vapor-liquid equilibrium data              | Exhibits an azeotrope; see Figure 3 for data at 1 atmosphere.                                              |
| <b>Flammability</b>                        |                                                                                                            |
| Flash Point                                | 73 °C (open cup)                                                                                           |
| Fire Point                                 | 74 °C <sup>24</sup>                                                                                        |
| <b>Transportation</b>                      |                                                                                                            |
| UN Number                                  | 2030                                                                                                       |
| UN and US CFR description <sup>21</sup>    | HYDRAZINE AQUEOUS SOLUTION, with more than 37% hydrazine, by mass                                          |
| UN and US CFR Classification <sup>21</sup> | 8 (Corrosives); subsidiary classification 6.1 (Toxic Substance); packing group I, II, or III <sup>25</sup> |

**Table 3. 25 wt% Aqueous hydrazine properties (see Table 1 for toxicity and miscibility information).**

|                               |                                                                  |
|-------------------------------|------------------------------------------------------------------|
| <b>Physical Properties</b>    |                                                                  |
| Appearance                    | Colorless liquid                                                 |
| Wt% hydrazine                 | 25                                                               |
| Melting Point                 | -30 °C <sup>26</sup>                                             |
| Boiling Point                 | 107 °C <sup>23</sup>                                             |
| Vapor Pressure                | 0.025 atm at 25 °C <sup>23</sup>                                 |
| Partial Pressure hydrazine    | 0.00086 atm (860 ppm) at 25 °C <sup>23</sup>                     |
| Vapor-liquid equilibrium data | Distills to an azeotrope; see Figure 3 for data at 1 atmosphere. |
| <b>Flammability</b>           |                                                                  |
| Flash Point                   | No flash point                                                   |
| <b>Transportation</b>         |                                                                  |

|                                            |                                                                       |
|--------------------------------------------|-----------------------------------------------------------------------|
| UN Number                                  | 3293                                                                  |
| UN and US CFR classification <sup>21</sup> | 6.1 (Toxic Substance); packing group III                              |
| UN and US CFR description <sup>21</sup>    | HYDRAZINE AQUEOUS SOLUTION, with not more than 37% hydrazine, by mass |

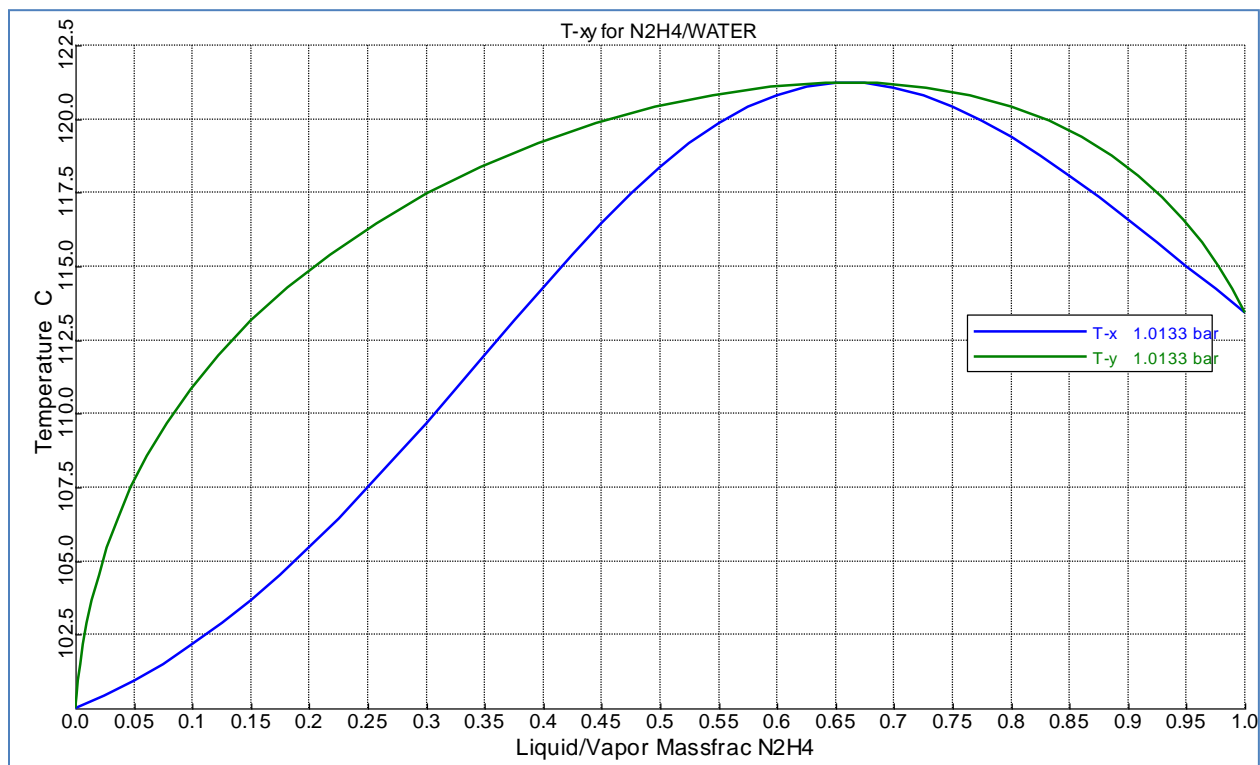

Figure 3. Txy plot for hydrazine-water mixtures at 1 atmosphere (from Aspen® software using default NRTL Binary Interaction Parameters).

## ABBREVIATIONS

|        |                                                                                                                                                                                                |
|--------|------------------------------------------------------------------------------------------------------------------------------------------------------------------------------------------------|
| ACGIH  | American Conference of Governmental Industrial Hygienists                                                                                                                                      |
| TLV    | Threshold Limit Value                                                                                                                                                                          |
| LFL    | Lower Flammability Limit                                                                                                                                                                       |
| ARC    | Accelerating Rate Calorimeter                                                                                                                                                                  |
| LC50   | Median Lethal Concentration of substance in air                                                                                                                                                |
| LOAEL  | Lowest-Observed-Adverse-Effect level                                                                                                                                                           |
| NIOSH  | National Institute for Occupational Safety and Health                                                                                                                                          |
| IDLH   | Immediately Dangerous to Life and Health                                                                                                                                                       |
| OSHA   | Occupational Safety and Health Administration                                                                                                                                                  |
| PEL    | Permissible Exposure Level                                                                                                                                                                     |
| PAC-2  | Protective Action Criteria level 2; an estimate of the concentration which for a 60 minute exposure may hinder the ability to escape or may cause irreversible or other serious health effects |
| EPA    | US Environmental Protection Agency                                                                                                                                                             |
| NBS    | US National Bureau of Standards                                                                                                                                                                |
| IARC   | International Agency for Research on Cancer                                                                                                                                                    |
| TWA    | Time Weighted Average                                                                                                                                                                          |
| LD50   | Median Lethal Dose                                                                                                                                                                             |
| UN     | United Nations                                                                                                                                                                                 |
| CFR    | US Code of Federal Regulations                                                                                                                                                                 |
| NRTL   | Non-Random Two Liquid model                                                                                                                                                                    |
| SARA   | Superfund Amendments and Reauthorization Act of 1986                                                                                                                                           |
| CAA    | Clean Air Act                                                                                                                                                                                  |
| CERCLA | Comprehensive Environmental Response, Compensation and Liability Act                                                                                                                           |
| EPCRA  | Emergency Planning and Community Right-to-Know Act                                                                                                                                             |

|      |                                                    |
|------|----------------------------------------------------|
| RMP  | Risk Management Plan                               |
| AIAA | American Institute of Aeronautics and Astronautics |
| CFR  | Code of Federal Regulations                        |

## REFERENCES

---

<sup>1</sup> The NBS Tables of Chemical Thermodynamic Properties, American Chemical Society and the American Institute of Physics for the National Bureau of Standards, Wagman D. D., et al., 1982.

<sup>2</sup> In addition to the references listed, most of this information can also be found in Schmidt (ref 2 in the article) along with extensive discussion.

<sup>3</sup> “Hawley’s Condensed Chemical Dictionary”, 15<sup>th</sup> ed., John Wiley and Sons, 2007.

<sup>4</sup> Arch Chemicals information  
(<http://www.archchemicals.com/Fed/HDR/Products/Propellants/Ultra.htm>).

<sup>5</sup> Literature vapor pressure data for anhydrous hydrazine is conveniently summarized in Aspen Properties®.

<sup>6</sup> “Ignition Handbook”, Babrauskus, Fire Science Publishers, 2003.

<sup>7</sup> Explosive decomposition of hydrazine by rapid compression of a gas volume, Bunker, R. L.; Baker, D. L.; Lee, J. H. S., Progress in Astronautics and Aeronautics, (1991), 133, 325-41.



---

<sup>8</sup> F. E. Scott, J. J. Burns, and B. Lewis, Explosive Properties of Hydrazine, Report of Investigations 4460, U.S. Dept. of the Interior, Bureau of Mines, Pittsburgh, Pa., May 1949.

<sup>9</sup> Based on an analysis of closed cup flash point data it appears the LFL is actually 4.0%. See the Flammability section.

<sup>10</sup> Aldrich MSDS.

<sup>11</sup> Highly variable. Hydrazine may partially decompose at test temperatures thereby changing the concentration tested. In addition, autoignition temperature varies with the equipment set due to variable heat losses and the potential for catalytic effects.

<sup>12</sup> The lower pressure limit is the total pressure below which it was not possible to obtain ignition under test conditions.

<sup>13</sup> Fire, Explosion, Compatibility, and Safety Hazards of Hypergols – Hydrazine, AIAA Special Project SP-084-1999, American Institute of Aeronautics and Astronautics, 1999.

<sup>14</sup> Upper heating value (assumes liquid water is a product rather than water vapor).

<sup>15</sup> See Thermal Stability section.

<sup>16</sup> IARC (International Agency for Research on Cancer) Monographs (<http://monographs.iarc.fr/ENG/Classification/index.php>).

<sup>17</sup> NIOSH (US National Institute for Occupational Safety and Health; <http://www.cdc.gov/niosh/idlh/302012.html>).

---

<sup>18</sup> Aldrich MSDS quoted ACGIH (American Conference of Governmental Industrial Hygienists) value.

<sup>19</sup> As published in the US National Institute for Occupational Safety and Health (NIOSH) Pocket Guide (<http://www.cdc.gov/niosh>).

<sup>20</sup> Arch Chemicals information  
(<http://www.archchemicals.com/Fed/HDR/Products/Hydrates/responsiblecare.htm>).

<sup>21</sup> See the UN Recommendations on the Transport of Dangerous Goods, and the US Code of Federal Regulations (49 CFR 172.101) for more information.

<sup>22</sup> Much of this information can also be found at the Arch Chemicals website (see ref 57 in the article) and in Schmidt (ref 2 in the article).

<sup>23</sup> Calculations performed using Aspen Plus® (Aspen Technology Inc.) software.

<sup>24</sup> Arch Chemicals information  
(<http://www.archchemicals.com/Fed/HDR/Products/Hydrates/default.htm>).

<sup>25</sup> UN 2030 can have a packing group of I, II, or III, depending on its corrosivity and toxicity, which are functions of concentration. See the UN Recommendations on the Transport of Dangerous Goods, and the US Code of Federal Regulations (49 CFR 172.101) for more information.

<sup>26</sup> “Kirk-Othmer Encyclopedia of Chemical Technology”, John Wiley and Sons, 1999.
